# Supplementary material
Source: MDPI journal article supplement (https://www.mdpi.com/1424-8247/15/12/1584)
Supplement: s1 [file s1]

## SUPPLEMENTARY TABLE S1

**Table S1. Quality assessment of diagnostic accuracy studies (QUADAS) for articles included in the systematic review.**

|                           | bias<br>patient<br>selection | bias<br>index<br>test | bias<br>reference<br>standard | bias<br>flow &<br>timing | applicability<br>patient<br>selection | applicability<br>index test | applicability<br>reference<br>standard |
|---------------------------|------------------------------|-----------------------|-------------------------------|--------------------------|---------------------------------------|-----------------------------|----------------------------------------|
| Bouros et al (19)         | 0                            | 0                     | 0                             | 0                        | 0                                     | 0                           | 0                                      |
| Cailes et al (20)         | 0                            | 0                     | 2                             | 0                        | 0                                     | 0                           | 0                                      |
| Clements et al (21)       | 0                            | 0                     | 0                             | 0                        | 0                                     | 0                           | 0                                      |
| De Santis et al (22)      | 0                            | 0                     | 0                             | 0                        | 0                                     | 0                           | 0                                      |
| Goh et al (23)            | 2                            | 0                     | 0                             | 0                        | 0                                     | 2                           | 0                                      |
| Goldin et al (24)         | 0                            | 0                     | 0                             | 0                        | 0                                     | 0                           | 0                                      |
| Hant et al (25)           | 0                            | 0                     | 0                             | 0                        | 0                                     | 0                           | 0                                      |
| Kowal-Bielecka et al (26) | 0                            | 0                     | 0                             | 0                        | 0                                     | 0                           | 0                                      |
| Moodley et al (27)        | 0                            | 0                     | 0                             | 0                        | 0                                     | 0                           | 0                                      |
| Nagasawa et al (28)       | 0                            | 0                     | 0                             | 0                        | 0                                     | 0                           | 0                                      |
| Prasse et al (29)         |                              | 0                     | 0                             | 0                        | 0                                     | 0                           | 0                                      |
| Salaffi et al (30)        |                              | 0                     | 0                             | 0                        | 0                                     | 0                           | 0                                      |
| Schmidt et al (31)        | 0                            | 0                     | 0                             | 0                        | 0                                     | 0                           | 0                                      |
| Southcott et al (32)      | 0                            | 0                     | 0                             | 0                        | 0                                     | 0                           | 0                                      |
| Volpinari et al (33)      | 2                            | 0                     | 0                             | 0                        | 0                                     | 0                           | 0                                      |
| Yilmaz et al (34)         | 2                            | 0                     | 0                             | 0                        | 2                                     | 0                           | 0                                      |
| Wells et al (35)          | 0                            | 0                     | 0                             | 0                        | 0                                     | 0                           | 0                                      |
| Behr et al (36)           | 0                            | 0                     | 0                             | 0                        | 0                                     | 0                           | 0                                      |

*QUADAS-2 comprises 4 domains: patient selection, index test, reference standard, and flow and timing. Each domain is assessed in terms of risk of bias; and the patient selection, index test, and reference standard domains are also assessed regarding applicability. 0= low risk; 1= high risk; 2= unclear risk.*
